# Supplementary material
Source: Springer Nature journal article supplement (https://www.springermedizin.de/resource/supplementary/13020_2006_3_MOESM5_ESM.pdf/9640790)

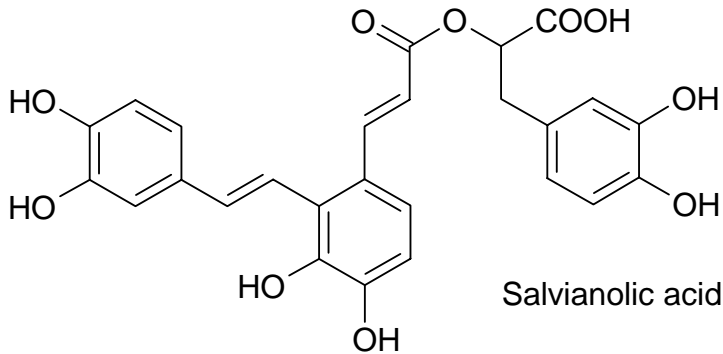

Salvianolic acid A

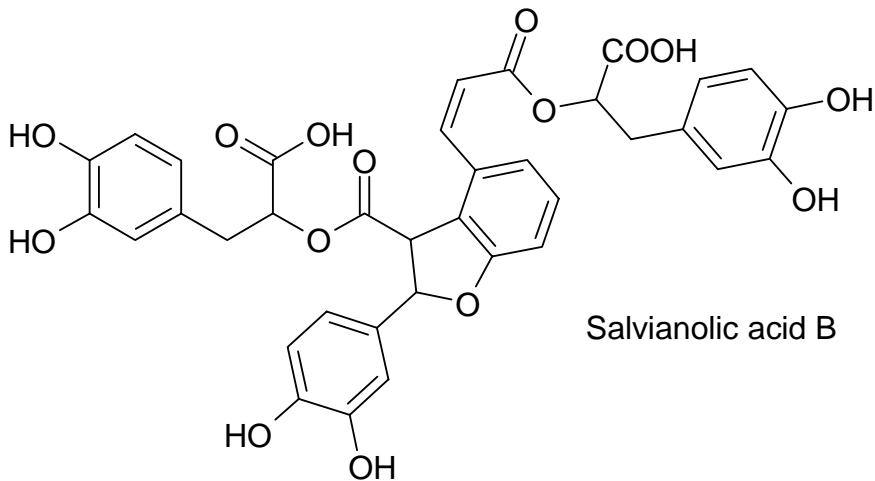

Salvianolic acid B

Supplement: MOESM5 [file 9640790]
